# Supplementary material for: PlaNC-TE: a comprehensive knowledgebase of non-coding RNAs and transposable elements in plants
Source: Oxford University Press journal article supplement (doi:10.1093/database/bay078), 2018-01-01
Supplement: bay078_tables1.pdf [file bay078_tables1.pdf]

**Table S1.** Species, version and source for ncRNAs/TEs used by each genome.

| Species                | Version                 | Source                                        |
|------------------------|-------------------------|-----------------------------------------------|
| <i>A. tauschii</i>     | ASM34733v1              | <a href="#">ncRNAs</a><br><a href="#">TEs</a> |
| <i>A. trichopoda</i>   | AMTR1.0                 | <a href="#">ncRNAs</a><br><a href="#">TEs</a> |
| <i>A. lyrata</i>       | v.1.0                   | <a href="#">ncRNAs</a><br><a href="#">TEs</a> |
| <i>A. thaliana</i>     | TAIR10                  | <a href="#">ncRNAs</a><br><a href="#">TEs</a> |
| <i>B. vulgaris</i>     | RefBeet-1.2.2           | <a href="#">ncRNAs</a><br><a href="#">TEs</a> |
| <i>B. distachyon</i>   | v1.0                    | <a href="#">ncRNAs</a><br><a href="#">TEs</a> |
| <i>B. oleracea</i>     | v2.1                    | <a href="#">ncRNAs</a><br><a href="#">TEs</a> |
| <i>B. rapa</i>         | IVFCAASv1               | <a href="#">ncRNAs</a><br><a href="#">TEs</a> |
| <i>C. reinhardtii</i>  | v3.1                    | <a href="#">ncRNAs</a><br><a href="#">TEs</a> |
| <i>C. crispus</i>      | ASM35022v2              | <a href="#">ncRNAs</a><br><a href="#">TEs</a> |
| <i>C. capsularis</i>   | CCACVL1_1.0             | <a href="#">ncRNAs</a><br><a href="#">TEs</a> |
| <i>C. merolae</i>      | ASM9120v1               | <a href="#">ncRNAs</a><br><a href="#">TEs</a> |
| <i>G. sulphuraria</i>  | ASM34128v1              | <a href="#">ncRNAs</a><br><a href="#">TEs</a> |
| <i>L. perrieri</i>     | Lperr_V1.4              | <a href="#">ncRNAs</a><br><a href="#">TEs</a> |
| <i>M. truncatula</i>   | MedtrA17_4.0            | <a href="#">ncRNAs</a><br><a href="#">TEs</a> |
| <i>M. acuminata</i>    | MA1                     | <a href="#">ncRNAs</a><br><a href="#">TEs</a> |
| <i>O. barthii</i>      | O.barthii_v1            | <a href="#">ncRNAs</a><br><a href="#">TEs</a> |
| <i>O. brachyantha</i>  | Oryza_brachyantha.v1.4b | <a href="#">ncRNAs</a><br><a href="#">TEs</a> |
| <i>O. glaberrima</i>   | AGI1.1                  | <a href="#">ncRNAs</a><br><a href="#">TEs</a> |
| <i>O. glumaepatula</i> | ALNU02000000            | <a href="#">ncRNAs</a><br><a href="#">TEs</a> |
| <i>O. indica</i>       | ASM465v1                | <a href="#">ncRNAs</a><br><a href="#">TEs</a> |

|                          |                          |                                               |
|--------------------------|--------------------------|-----------------------------------------------|
| <i>O. longistaminata</i> | O_longistaminata_v1.0    | <a href="#">ncRNAs</a><br><a href="#">TEs</a> |
| <i>O. meridionalis</i>   | Oryza_meridionalis_v1.3  | <a href="#">ncRNAs</a><br><a href="#">TEs</a> |
| <i>O. nivara</i>         | AWHD000000000            | <a href="#">ncRNAs</a><br><a href="#">TEs</a> |
| <i>O. punctata</i>       | AVCL000000000            | <a href="#">ncRNAs</a><br><a href="#">TEs</a> |
| <i>O. rufipogon</i>      | OR_W1943                 | <a href="#">ncRNAs</a><br><a href="#">TEs</a> |
| <i>O. sativa</i>         | IRGSP-1.0                | <a href="#">ncRNAs</a><br><a href="#">TEs</a> |
| <i>O. lucimarinus</i>    | ASM9206v1                | <a href="#">ncRNAs</a><br><a href="#">TEs</a> |
| <i>P. patens</i>         | ASM242v1                 | <a href="#">ncRNAs</a><br><a href="#">TEs</a> |
| <i>P. trichocarpa</i>    | JGI2.0                   | <a href="#">ncRNAs</a><br><a href="#">TEs</a> |
| <i>S. moellendorffii</i> | v1.0                     | <a href="#">ncRNAs</a><br><a href="#">TEs</a> |
| <i>S. italica</i>        | JGIv2.0                  | <a href="#">ncRNAs</a><br><a href="#">TEs</a> |
| <i>S. lycopersicum</i>   | SL2.50                   | <a href="#">ncRNAs</a><br><a href="#">TEs</a> |
| <i>S. tuberosum</i>      | SolTub_3.0               | <a href="#">ncRNAs</a><br><a href="#">TEs</a> |
| <i>S. bicolor</i>        | Sorghum_bicolor_NCBIV3   | <a href="#">ncRNAs</a><br><a href="#">TEs</a> |
| <i>T. cacao</i>          | Theobroma_cacao_20110822 | <a href="#">ncRNAs</a><br><a href="#">TEs</a> |
| <i>T. aestivum</i>       | TGACv1                   | <a href="#">ncRNAs</a><br><a href="#">TEs</a> |
| <i>T. urartu</i>         | ASM34745v1               | <a href="#">ncRNAs</a><br><a href="#">TEs</a> |
| <i>V. vinifera</i>       | IGGP_12x                 | <a href="#">ncRNAs</a><br><a href="#">TEs</a> |
| <i>Z. mays</i>           | B73_RefGen_v4            | <a href="#">ncRNAs</a><br><a href="#">TEs</a> |
