# Supplementary material for: PlaNC-TE: a comprehensive knowledgebase of non-coding RNAs and transposable elements in plants
Source: Oxford University Press journal article supplement (doi:10.1093/database/bay078), 2018-01-01
Supplement: bay078_tables2.pdf [file bay078_tables2.pdf]

**Table S2.** TEs shared by Repbase and Ensembl Plants (EP) databases. Cutoff: 80% or higher identity and minimum of 80 nucleotides in the sequence.

| Species                  | Rebase (TEs) | Rebase vs EP | TEs %         |
|--------------------------|--------------|--------------|---------------|
| <i>A. trichopoda</i>     | 389          | 112          | <b>28.79</b>  |
| <i>B. oleracea</i>       | 23           | 20           | <b>86.96</b>  |
| <i>C. crispus</i>        | 1181         | 42           | <b>3.56</b>   |
| <i>G. max</i>            | 13           | 13           | <b>100.00</b> |
| <i>M. truncatula</i>     | 211          | 200          | <b>94.79</b>  |
| <i>M. acuminata</i>      | 2            | 2            | <b>100.00</b> |
| <i>P. patens</i>         | 56           | 29           | <b>51.79</b>  |
| <i>P. trichocarpa</i>    | 226          | 215          | <b>95.13</b>  |
| <i>S. moellendorffii</i> | 84           | 76           | <b>90.48</b>  |
| <i>V. vinifera</i>       | 176          | 163          | <b>92.61</b>  |
