# Supplementary material for: PlaNC-TE: a comprehensive knowledgebase of non-coding RNAs and transposable elements in plants
Source: Oxford University Press journal article supplement (doi:10.1093/database/bay078), 2018-01-01
Supplement: bay078_tables3.pdf [file bay078_tables3.pdf]

**Table S3.** ncRNA, TE and overlap entries.

| Species                           | ncRNAs | TEs       | ncRNA:TE Overlaps | No Overlap (ncRNA/TE) |
|-----------------------------------|--------|-----------|-------------------|-----------------------|
| <i>Aegilops tauschii</i>          | 2,345  | 2,253,478 | 276               | 2,100/2,253,218       |
| <i>Amborella trichopoda</i>       | 728    | 153,241   | 219               | 519/153,032           |
| <i>Arabidopsis lyrata</i>         | 833    | 116,145   | 466               | 471/115,729           |
| <i>Arabidopsis thaliana</i>       | 1,429  | 43,442    | 722               | 770/42,728            |
| <i>Beta vulgaris</i>              | 1,510  | 6,295     | 3                 | 148/6,292             |
| <i>Brachypodium distachyon</i>    | 1,278  | 106,890   | 180               | 1,124/10,510          |
| <i>Brassica napus</i>             | 4,236  | 0         | 0                 | 4,236/0               |
| <i>Brassica oleracea</i>          | 1,469  | 160,486   | 381               | 1,113/160,125         |
| <i>Brassica rapa</i>              | 1,291  | 97,576    | 483               | 845/97,107            |
| <i>Chlamydomonas reinhardtii</i>  | 197    | 64,925    | 50                | 153/64,879            |
| <i>Chondrus crispus</i>           | 16     | 910       | 2                 | 14/908                |
| <i>Corchorus capsularis</i>       | 1,216  | 252,864   | 546               | 687/252,347           |
| <i>Cucumis sativus</i>            | 299    | 0         | 0                 | 299/0                 |
| <i>Cyanidioschyzon merolae</i>    | 12     | 3,351     | 4                 | 8/3,347               |
| <i>Dioscorea rotundata</i>        | 154    | 0         | 0                 | 154/0                 |
| <i>Galdieria sulphuraria</i>      | 13     | 109       | 1                 | 12/108                |
| <i>Glycine max</i>                | 426    | 373,988   | 0                 | 426/373,988           |
| <i>Gossypium raimondii</i>        | 511    | 341,493   | 0                 | 511/341,493           |
| <i>Helianthus annuus</i>          | 737    | 0         | 0                 | 737/0                 |
| <i>Hordeum vulgare</i>            | 2,929  | 2,436,843 | 0                 | 2,929/2,436,843       |
| <i>Leersia perrieri</i>           | 899    | 112,058   | 220               | 694/111,838           |
| <i>Lupinus angustifolius</i>      | 548    | 0         | 0                 | 548/0                 |
| <i>Manihot esculenta</i>          | 472    | 0         | 0                 | 472/0                 |
| <i>Medicago truncatula</i>        | 1,398  | 478,378   | 380               | 1,064/478,011         |
| <i>Musa acuminata</i>             | 1,079  | 116,189   | 251               | 842/115,939           |
| <i>Nicotiana attenuata</i>        | 375    | 0         | 0                 | 375/0                 |
| <i>Oryza barthii</i>              | 948    | 185,442   | 161               | 795/185,281           |
| <i>Oryza brachyantha</i>          | 443    | 380,576   | 245               | 280/380,333           |
| <i>Oryza glaberrima</i>           | 701    | 695,468   | 528               | 366/695,066           |
| <i>Oryza glumaepatula</i>         | 684    | 201,805   | 124               | 567/20,1681           |
| <i>Oryza indica</i>               | 1,285  | 232,693   | 520               | 788/232,194           |
| <i>Oryza longistaminata</i>       | 1,179  | 129,481   | 181               | 1,009/129,300         |
| <i>Oryza meridionalis</i>         | 957    | 193,661   | 210               | 767/193,452           |
| <i>Oryza nivara</i>               | 756    | 178,734   | 113               | 648/178,623           |
| <i>Oryza punctata</i>             | 834    | 190,594   | 190               | 654/190,405           |
| <i>Oryza rufipogon</i>            | 785    | 204,639   | 128               | 664/204,511           |
| <i>Oryza sativa</i>               | 926    | 603,608   | 1,087             | 414/602,776           |
| <i>Ostreococcus lucimarinus</i>   | 24     | 1,169     | 2                 | 22/1,167              |
| <i>Phaseolus vulgaris</i>         | 338    | 138       | 0                 | 338/138               |
| <i>Physcomitrella patens</i>      | 553    | 461,547   | 53                | 505/461,505           |
| <i>Populus trichocarpa</i>        | 967    | 248,622   | 373               | 636/248,275           |
| <i>Prunus persica</i>             | 234    | 29,599    | 0                 | 234/29,599            |
| <i>Selaginella moellendorffii</i> | 1,312  | 116,938   | 532               | 840/116,434           |
| <i>Setaria italica</i>            | 859    | 154,873   | 150               | 715/154,727           |
| <i>Solanum lycopersicum</i>       | 1,404  | 575,496   | 295               | 1,138/575,203         |

|                           |               |                   |               |                  |
|---------------------------|---------------|-------------------|---------------|------------------|
| <i>Solanum tuberosum</i>  | 1,409         | 993,218           | 395           | 1,065/992,827    |
| <i>Sorghum bicolor</i>    | 1,359         | 428,546           | 338           | 1,034/428,210    |
| <i>Theobroma cacao</i>    | 519           | 123,180           | 140           | 389/12,181       |
| <i>Trifolium pratense</i> | 1,236         | 0                 | 0             | 1,236/0          |
| <i>Triticum aestivum</i>  | 7,857         | 13,445,260        | 2,168         | 6,138/13,443,322 |
| <i>Triticum urartu</i>    | 1,987         | 2,250,260         | 187           | 1,819/2,250,088  |
| <i>Vitis vinifera</i>     | 637           | 281,476           | 131           | 521/281,349      |
| <i>Zea mays</i>           | 1,797         | 1,791,946         | 1,915         | 794/1,790,828    |
| <b>Total</b>              | <b>58,390</b> | <b>31,217,630</b> | <b>14,350</b> |                  |
