# Supplementary material for: PlaNC-TE: a comprehensive knowledgebase of non-coding RNAs and transposable elements in plants
Source: Oxford University Press journal article supplement (doi:10.1093/database/bay078), 2018-01-01
Supplement: bay078_tables4.pdf [file bay078_tables4.pdf]

**Table S4.** Overlapped records from PlanTE-MIR DB remapped in Ensembl Plants (EP) genomes.

| Species               | PlanTE-MIR DB (Overlaps) | EP (miRs) | EP (TEs) | EP (Overlaps) |
|-----------------------|--------------------------|-----------|----------|---------------|
| <i>A. trichopoda</i>  | <b>22</b>                | 21        | 22       | <b>21</b>     |
| <i>B. distachyon</i>  | <b>2</b>                 | 2         | 2        | <b>2</b>      |
| <i>G. max</i>         | <b>4</b>                 | 4         | 4        | <b>4</b>      |
| <i>M. truncatula</i>  | <b>20</b>                | 20        | 20       | <b>22</b>     |
| <i>O. sativa</i>      | <b>56</b>                | 56        | 57       | <b>48</b>     |
| <i>P. patens</i>      | <b>1</b>                 | 1         | 1        | <b>1</b>      |
| <i>P. trichocarpa</i> | <b>10</b>                | 10        | 10       | <b>10</b>     |
| <i>S. bicolor</i>     | <b>35</b>                | 34        | 35       | <b>33</b>     |
| <i>S. tuberosum</i>   | <b>1</b>                 | 1         | 1        | <b>2</b>      |
| <i>V. vinifera</i>    | <b>1</b>                 | 1         | 1        | <b>1</b>      |
