# Supplementary material for: PlaNC-TE: a comprehensive knowledgebase of non-coding RNAs and transposable elements in plants
Source: Oxford University Press journal article supplement (doi:10.1093/database/bay078), 2018-01-01
Supplement: bay078_tables5.pdf [file bay078_tables5.pdf]

1 –TSV custom file available on page “Download & JBrowse”. This file is composed to 24 columns which are filled with features about ncRNAs and TEs that overlap each other.

**ncRNAs features**

Column 1: Region (Chr, Scaffold or Contig).  
Column 2: Source of the annotation.  
Column 3: Biotype of the sequence.  
Column 4: Start of the sequence.  
Column 5: End of the sequence.  
Column 6: Length.  
Column 7: Minus or Plus.  
Column 8: Score.  
Column 9: ID Gene.  
Column 10: Name.  
Column 11: Description.  
Column 12: Sequence.

**TEs features**

Column 13: Region (Chr, Scaffold or Contig).  
Column 14: Source of the annotation.  
Column 15: Type of the sequence.  
Column 16: Start of the sequence.  
Column 17: End of the sequence.  
Column 18: Length.  
Column 19: Minus or Plus.  
Column 20: Score.  
Column 21: ID.  
Column 22: Repeat name.  
Column 23: Repeat type.  
Column 24: Sequence.
